# Supplementary material for: The Novel, Nicotinic Alpha7 Receptor Partial Agonist, BMS-933043, Improves Cognition and Sensory Processing in Preclinical Models of Schizophrenia
Source: PubMed Central journal article supplement (PMC4965148; doi:10.1371/journal.pone.0159996), 2016-07-28
Supplement: pone.0159996.s001.pdf [file pone.0159996.s001.pdf]

**S1 Dataset. Individual human  $\alpha 7$  nAChR EC<sub>50</sub> or 5-HT<sub>3A</sub> IC<sub>50</sub> values determined in Ca<sup>2+</sup> flux (FLIPR) assays.**

| <b>Compound</b> | <b>n</b> | <b>Human <math>\alpha 7</math> nAChR EC<sub>50</sub> values (nM)</b>                          |
|-----------------|----------|-----------------------------------------------------------------------------------------------|
| BMS-933043      | 16       | 13.4; 21.4; 9.4; 30.5; 15.1; 50.0; 19.2; 14.8; 18.2; 17.3; 28.2; 17.0; 23.3; 28.7; 40.8; 27.3 |
| EVP-6124        | 4        | 16.3; 29.4; 4.0; 9.0                                                                          |
| TC-5619         | 5        | 1.9; 5.0; 6.6; 2.5; 3.3                                                                       |
| A-582941        | 6        | 92.1; 189.2; 101.3; 69.3; 41.0; 45.8                                                          |
| PNU-282987      | 9        | 105.8; 98.2; 88.4; 74.4; 81.4; 117.8; 46.0; 145.4; 92.8                                       |
| NS-6740         | 7        | >100,000; >100,000; >100,000; >100,000; >100,000; >100,000; >100,000                          |
| <b>Compound</b> | <b>n</b> | <b>Human 5-HT<sub>3A</sub> IC<sub>50</sub> values (<math>\mu</math>M)</b>                     |
| BMS-933043      | 10       | 10.54; 7.20; 8.02; 6.88; 7.28; 4.89; 12.44; 5.32; 8.67; 9.42                                  |
| EVP-6124        | 5        | 0.006; 0.003; 0.001; 0.004; 0.005                                                             |
| TC-5619         | 9        | >100; >100; >100; >100; >100; >100; >100; >100; >100                                          |
| A-582941        | 10       | 0.086; 0.344; 0.072; 0.073; 0.075; 0.076; 0.109; 0.047; 0.079; 0.059                          |
| PNU-282987      | 5        | 32.065; 23.639; 6.347; 38.428; 24.115                                                         |
| NS-6740         | 9        | 4.699; 5.682; 4.425; 6.208; 5.694; 5.320; 5.908; 2.390; 3.114                                 |
