# Supplementary material for: The Novel, Nicotinic Alpha7 Receptor Partial Agonist, BMS-933043, Improves Cognition and Sensory Processing in Preclinical Models of Schizophrenia
Source: PubMed Central journal article supplement (PMC4965148; doi:10.1371/journal.pone.0159996), 2016-07-28
Supplement: pone.0159996.s002.pdf [file pone.0159996.s002.pdf]

**S2 Dataset. Individual Ki values determined by radioligand binding at rat or human** **$\alpha$ 7 nAChR and human 5-HT<sub>3A</sub> receptors.**

| Compound     | n | Rat Brain $\alpha$ 7 nAChR Ki (nM)      |
|--------------|---|-----------------------------------------|
| BMS-933043   | 6 | 2.67; 2.99; 3.08; 3.74; 3.20; 3.82      |
| Epibatidine  | 6 | 3.90; 5.40; 5.0; 6.10; 5.90; 5.10       |
| TC-5619      | 2 | 0.182; 0.279                            |
| EVP-6124     | 2 | 0.529; 1.00                             |
| A-582941     | 2 | 23; 20.3                                |
| MLA          | 2 | 0.30; 0.20                              |
| NS-6740      | 3 | 2.45; 2.78; 3.33                        |
| (-) Nicotine | 2 | 389; 292                                |
| Compound     | n | HEK293/human $\alpha$ 7 nAChR Ki (nM)   |
| BMS-933043   | 4 | 10.5; 5.7; 8.1; 8.1                     |
| Epibatidine  | 4 | 12.9; 9.8; 9.7; 9.7                     |
| TC-5619      | 2 | 1.0; 0.8                                |
| EVP-6124     | 2 | 2.2; 3.8                                |
| A-582941     | 3 | 99; 72.5; 76.3                          |
| MLA          | 3 | 4.3; 4.3; 3.9                           |
| (-) Nicotine | 3 | 551; 567; 460                           |
| Compound     | n | HEK293/human 5-HT <sub>3A</sub> Ki (nM) |
| BMS-933043   | 2 | 2,312; 2,590                            |
| EVP-6124     | 1 | 2.5                                     |
| TC-5619      | 1 | >10,000                                 |
| Granisetron  | 3 | 1.2; 1.7; 2.2                           |
| MDL-72222    | 5 | 6; 7.3; 6.6; 9.2; 18                    |
