# Supplementary material for: The Novel, Nicotinic Alpha7 Receptor Partial Agonist, BMS-933043, Improves Cognition and Sensory Processing in Preclinical Models of Schizophrenia
Source: PubMed Central journal article supplement (PMC4965148; doi:10.1371/journal.pone.0159996), 2016-07-28
Supplement: pone.0159996.s003.pdf [file pone.0159996.s003.pdf]

**S3 Dataset: Individual peak current and current area (net charge) values in HEK293 cells expressing human or rat  $\alpha 7$  nAChR determined by patch clamp electrophysiology.**

| Rat $\alpha 7$ nAChR/HEK293 cells: BMS-933043 Peak Current normalized to 3 mM ACh                     |          |          |          |          |
|-------------------------------------------------------------------------------------------------------|----------|----------|----------|----------|
| 0.1 $\mu$ M                                                                                           | 0.011578 | 0.010832 | 0.012359 | 0.013095 |
| 0.3 $\mu$ M                                                                                           | 0.04784  | 0.028294 | 0.032838 | 0.036686 |
| 1 $\mu$ M                                                                                             | 0.08082  | 0.071105 | 0.073558 | 0.074896 |
| 3 $\mu$ M                                                                                             | 0.155794 | 0.151942 | 0.165138 | 0.13648  |
| 10 $\mu$ M                                                                                            | 0.2731   | 0.29042  | 0.295206 | 0.215272 |
| Rat $\alpha 7$ nAChR/HEK293 cells: BMS-933043 Net Charge (Current Area) normalized to 300 $\mu$ M ACh |          |          |          |          |
| 0.1 $\mu$ M                                                                                           | 0.00864  | -0.014   | 0.059171 | 0.087701 |
| 0.3 $\mu$ M                                                                                           | 0.413801 | 0.285276 | 0.473938 | 0.525558 |
| 1 $\mu$ M                                                                                             | 0.717234 | 0.355507 | 0.662611 | 0.654857 |
| 3 $\mu$ M                                                                                             | 0.791905 | 0.479351 | 0.667657 | 0.656892 |
| 10 $\mu$ M                                                                                            | 0.826588 | 0.463709 | 0.732215 | 0.667285 |

| Human $\alpha 7$ nAChR/HEK293 cells: BMS-933043 Peak Current normalized to 3 mM ACh                     |          |          |          |          |          |          |          |
|---------------------------------------------------------------------------------------------------------|----------|----------|----------|----------|----------|----------|----------|
| 0.1 $\mu$ M                                                                                             | 0.005961 | 0.006675 | 0.008382 | 0.007317 | 0.006875 | 0.005721 | 0.00606  |
| 0.3 $\mu$ M                                                                                             | 0.026371 | 0.023027 | 0.023888 | 0.024376 | 0.029505 | 0.03259  | 0.027371 |
| 1 $\mu$ M                                                                                               | 0.054785 | 0.032937 | 0.043924 | 0.05131  | 0.085041 | 0.080244 | 0.072721 |
| 3 $\mu$ M                                                                                               | 0.126023 | 0.099704 | 0.109235 | 0.099127 | 0.19658  | 0.201977 | 0.18297  |
| 10 $\mu$ M                                                                                              | 0.216951 | 0.153151 | 0.170151 | 0.177877 | 0.333392 | 0.298713 | 0.30045  |
| Human $\alpha 7$ nAChR/HEK293 cells: BMS-933043 Net Charge (Current Area) normalized to 300 $\mu$ M ACh |          |          |          |          |          |          |          |
| 0.1 $\mu$ M                                                                                             | 0.019825 | 0.013184 | 0.038657 | 0.037817 | 0.022826 | 0.013267 | 0.038558 |
| 0.3 $\mu$ M                                                                                             | 0.349601 | 0.36236  | 0.321236 | 0.321544 | 0.295406 | 0.357581 | 0.414317 |
| 1 $\mu$ M                                                                                               | 0.695221 | 0.630407 | 0.655398 | 0.612181 | 0.619044 | 0.659231 | 0.812854 |
| 3 $\mu$ M                                                                                               | 0.794676 | 0.779117 | 0.765452 | 0.70252  | 0.69028  | 0.699137 | 0.88799  |
| 10 $\mu$ M                                                                                              | 0.80353  | 0.753716 | 0.796899 | 0.763672 | 0.722352 | 0.678848 | 0.882297 |

| Rat $\alpha 7$ nAChR/HEK293 cells: NS-6740 Inhibition of BMS-933043 Peak Current normalized to BMS-933043 10 $\mu$ M alone              |          |          |          |          |          |          |
|-----------------------------------------------------------------------------------------------------------------------------------------|----------|----------|----------|----------|----------|----------|
| 10 nM                                                                                                                                   | 1.119375 | 1.054216 | 0.873004 | 1.024836 | 1.218392 | 1.26404  |
| 30 nM                                                                                                                                   | 1.065267 | 1.128172 | 1.034426 | 1.099443 | 1.466008 | 0.918053 |
| 100 nM                                                                                                                                  | 1.201133 | 1.193386 | 1.131201 | 0.996583 | 1.193301 | 1.047291 |
| 300 nM                                                                                                                                  | 1.080938 | 0.455813 | 0.828201 | 0.196243 | 0.331568 | 0.197239 |
| 1 $\mu$ M                                                                                                                               | 0.096116 | 0.087506 | 0.101631 | 0.096465 | 0.170634 | 0.061213 |
| 3 $\mu$ M                                                                                                                               | 0.054793 | 0.084062 | 0.113831 | 0.060629 | 0.090642 | 0.044333 |
| Rat $\alpha 7$ nAChR/HEK293 cells: NS-6740 Inhibition of BMS-933043 Net Charge (Current Area) normalized to BMS-933043 10 $\mu$ M alone |          |          |          |          |          |          |
| 10 nM                                                                                                                                   | 0.936133 | 1.053484 | 1.037169 | 1.061256 | 1.326628 | 1.336793 |

|           |          |          |          |          |          |          |
|-----------|----------|----------|----------|----------|----------|----------|
| 30 nM     | 0.823193 | 0.964182 | 0.851603 | 1.057142 | 1.360053 | 0.761557 |
| 100 nM    | 0.872405 | 0.941266 | 1.090588 | 0.886582 | 1.080852 | 1.082328 |
| 300 nM    | 0.869644 | 0.370161 | 0.746063 | 0.150527 | 0.186606 | 0.211792 |
| 1 $\mu$ M | 0.047941 | 0.064529 | 0.132148 | 0.068485 | 0.059664 | 0.059869 |
| 3 $\mu$ M | -0.00202 | -0.01005 | -0.01049 | 0.007827 | 0.00378  | 0.007194 |

| Human $\alpha$ 7 nAChR/HEK293 cells: EVP-6124 Peak Current normalized to 3 mM ACh                     |          |          |          |          |
|-------------------------------------------------------------------------------------------------------|----------|----------|----------|----------|
| 0.03 $\mu$ M                                                                                          | 0.023095 | 0.030321 | 0.023284 | 0.013159 |
| 0.1 $\mu$ M                                                                                           | 0.048497 | 0.067042 | 0.097102 | 0.041302 |
| 0.3 $\mu$ M                                                                                           | 0.071567 | 0.107206 | 0.154024 | 0.076664 |
| 1 $\mu$ M                                                                                             | 0.127042 | 0.144738 | 0.254666 | 0.142149 |
| 3 $\mu$ M                                                                                             | 0.187737 | 0.244068 | 0.383192 | 0.255804 |
| 10 $\mu$ M                                                                                            | 0.243764 | 0.265356 | 0.462654 | 0.303426 |
| Human $\alpha$ 7 nAChR/HEK293 cells: EVP-6124 Net Charge (Current Area) normalized to 300 $\mu$ M ACh |          |          |          |          |
| 0.03 $\mu$ M                                                                                          | 0.163264 | 0.206418 | 0.115292 | 0.134195 |
| 0.1 $\mu$ M                                                                                           | 0.840485 | 1.081258 | 0.847891 | 0.872342 |
| 0.3 $\mu$ M                                                                                           | 1.200793 | 1.30184  | 1.444892 | 1.418354 |
| 1 $\mu$ M                                                                                             | 1.413753 | 1.498727 | 1.608322 | 1.442349 |
| 3 $\mu$ M                                                                                             | 1.219895 | 1.197068 | 1.303621 | 1.069781 |
| 10 $\mu$ M                                                                                            | 0.34903  | 0.405457 | 0.393906 | 0.326985 |

| Rat $\alpha$ 7 nAChR/HEK293 cells: TC-5619 Peak Current normalized to 3mM ACh                      |          |          |          |
|----------------------------------------------------------------------------------------------------|----------|----------|----------|
| 0.001 $\mu$ M                                                                                      | 0.003543 | 0.011618 | 0.003662 |
| 0.003 $\mu$ M                                                                                      | 0.003116 | 0.008701 | 0.005453 |
| 0.01 $\mu$ M                                                                                       | 0.006073 | 0.007536 | 0.009875 |
| 0.03 $\mu$ M                                                                                       | 0.020042 | 0.015667 | 0.021391 |
| 0.1 $\mu$ M                                                                                        | 0.054081 | 0.04485  | 0.051832 |
| 0.3 $\mu$ M                                                                                        | 0.159873 | 0.12415  | 0.114915 |
| 1 $\mu$ M                                                                                          | 0.276001 | 0.257587 | 0.267948 |
| 3 $\mu$ M                                                                                          | 0.4166   | 0.427866 | 0.455481 |
| 10 $\mu$ M                                                                                         | 0.484663 | 0.485054 | 0.673182 |
| Rat $\alpha$ 7 nAChR/HEK293 cells: TC-5619 Net Charge (Current Area) normalized to 300 $\mu$ M ACh |          |          |          |
| 0.001 $\mu$ M                                                                                      | 0.012908 | 0.179462 | 0.008199 |
| 0.003 $\mu$ M                                                                                      | -0.00013 | 0.032411 | 0.001885 |
| 0.01 $\mu$ M                                                                                       | 0.000016 | 0.002188 | -0.00959 |
| 0.03 $\mu$ M                                                                                       | 0.149155 | 0.14684  | 0.202789 |
| 0.1 $\mu$ M                                                                                        | 0.687896 | 0.723864 | 0.848076 |
| 0.3 $\mu$ M                                                                                        | 1.092841 | 1.106901 | 1.105128 |
| 1 $\mu$ M                                                                                          | 1.241725 | 1.14323  | 1.297158 |
| 3 $\mu$ M                                                                                          | 1.233945 | 1.270866 | 1.311737 |
| 10 $\mu$ M                                                                                         | 1.226251 | 1.317075 | 1.306027 |
