# Supplementary material for: The Novel, Nicotinic Alpha7 Receptor Partial Agonist, BMS-933043, Improves Cognition and Sensory Processing in Preclinical Models of Schizophrenia
Source: PubMed Central journal article supplement (PMC4965148; doi:10.1371/journal.pone.0159996), 2016-07-28
Supplement: pone.0159996.s004.pdf [file pone.0159996.s004.pdf]

**S4 Dataset. % Discrimination Index (DI) results for individual subjects evaluated in mouse NOR after BMS-933043 treatment (0.03 - 1 mg/kg).**

| Session             | % Discrimination Index (DI) |                          |                         |                         |                       |
|---------------------|-----------------------------|--------------------------|-------------------------|-------------------------|-----------------------|
|                     | Vehicle                     | 0.03 mg/kg<br>BMS-933043 | 0.1 mg/kg<br>BMS-933043 | 0.3 mg/kg<br>BMS-933043 | 1 mg/kg<br>BMS-933043 |
| Training<br>(day 2) | -3.917                      | -54.916                  | -29.043                 | 0.162                   | 1.660                 |
|                     | 17.515                      | 24.734                   | 33.714                  | 53.997                  | -0.048                |
|                     | 29.564                      | 7.488                    | 5.907                   | 18.024                  | 12.620                |
|                     | -23.042                     | 13.289                   | 23.695                  | 13.466                  | -13.865               |
|                     | 12.872                      | -17.384                  | 5.407                   | -11.337                 | -7.296                |
|                     | 18.407                      | 14.047                   | 1.825                   | -17.989                 | 33.864                |
|                     | 5.160                       | -17.324                  | 25.542                  | 22.940                  | -5.790                |
|                     | 0.625                       | 18.304                   | 9.515                   | -27.731                 | -5.687                |
|                     | 9.129                       | 54.322                   | 22.568                  | 9.896                   | -5.394                |
|                     | 12.183                      | 5.915                    | 20.966                  | -23.664                 | 11.280                |
|                     | 37.654                      | -8.777                   | -2.211                  | 6.827                   | -4.256                |
|                     |                             | 1.381                    | -19.794                 | -30.548                 | -17.386               |
|                     |                             |                          | 21.619                  |                         | -13.115               |
| Mean ± SEM          | 10.56 ± 4.94                | 3.42 ± 7.75              | 9.21 ± 5.10             | 1.17 ± 7.17             | -1.03 ± 3.80          |
| Testing<br>(day 3)  | -37.767                     | -1.495                   | -24.374                 | 16.697                  | 25.370                |
|                     | 8.182                       | 5.238                    | 58.085                  | 13.188                  | 11.617                |
|                     | -13.332                     | 30.399                   | 30.161                  | 13.950                  | 14.092                |
|                     | 32.914                      | -11.785                  | 39.122                  | 32.210                  | 16.034                |
|                     | -47.755                     | 11.111                   | 34.247                  | 50.151                  | 50.381                |
|                     | -3.810                      | 60.305                   | 41.627                  | 32.757                  | 36.667                |
|                     | 11.476                      | 6.107                    | 33.604                  | 31.807                  | 20.309                |
|                     | -1.149                      | 27.678                   | -1.304                  | 3.353                   | 2.843                 |
|                     | 13.580                      | -36.477                  | 44.255                  | -9.839                  | 42.802                |
|                     | 29.004                      | 15.251                   | 28.327                  | 0.405                   | 29.506                |
|                     | -3.311                      | 27.841                   | 32.642                  | 42.771                  | 37.167                |
|                     |                             | 21.506                   | -6.339                  | 22.038                  | 39.626                |
|                     |                             | 32.254                   |                         | 30.807                  |                       |
| Mean ± SEM          | -1.09 ± 7.51                | 12.97 ± 6.98             | 26.33 ± 6.37            | 20.79 ± 5.17            | 27.48 ± 3.86          |
