# Supplementary material for: The Novel, Nicotinic Alpha7 Receptor Partial Agonist, BMS-933043, Improves Cognition and Sensory Processing in Preclinical Models of Schizophrenia
Source: PubMed Central journal article supplement (PMC4965148; doi:10.1371/journal.pone.0159996), 2016-07-28
Supplement: pone.0159996.s005.pdf [file pone.0159996.s005.pdf]

**S5 Dataset. % Discrimination index (DI) results for individual subjects evaluated in mouse NOR after BMS-933043 treatment (1 - 10 mg/kg).**

| Session             | % Discrimination Index (DI) |                       |                       |                        |
|---------------------|-----------------------------|-----------------------|-----------------------|------------------------|
|                     | Vehicle                     | 1 mg/kg<br>BMS-933043 | 3 mg/kg<br>BMS-933043 | 10 mg/kg<br>BMS-933043 |
| Training<br>(day 2) | -20.382                     | 37.508                | 34.831                | 25.053                 |
|                     | -19.014                     | 15.604                | -7.759                | -3.752                 |
|                     | -8.403                      | -13.452               | -22.743               | -9.240                 |
|                     | 11.424                      | 50.637                | 13.297                | 16.252                 |
|                     | 0.535                       | 20.498                | 11.713                | 2.684                  |
|                     | -8.411                      | 2.340                 | -33.017               | 15.388                 |
|                     | 13.792                      | -9.246                | 27.449                | 3.885                  |
|                     | -7.536                      | 20.111                | -22.006               | 23.627                 |
|                     | -36.006                     | 17.399                | -19.297               | -4.680                 |
|                     | 34.802                      | 7.556                 | 32.852                | 36.085                 |
|                     |                             | -42.411               | -47.820               | 2.089                  |
|                     |                             | -35.512               | -6.703                | -15.306                |
|                     |                             | -27.850               |                       | -22.073                |
| Mean ± SEM          | -3.92 ± 6.37                | 3.32 ± 7.75           | -3.27 ± 7.83          | 5.39 ± 4.72            |
| Testing<br>(day 3)  | 3.672                       | 61.518                | 79.683                | -0.457                 |
|                     | 12.588                      | 66.122                | -18.950               | 12.908                 |
|                     | -11.695                     | 48.906                | 0.957                 | 30.488                 |
|                     | -6.555                      | 10.098                | 22.321                | 48.865                 |
|                     | 16.645                      | 1.074                 | 28.721                | 31.973                 |
|                     | -17.283                     | 32.340                | 13.789                | 34.568                 |
|                     | 9.871                       | 43.933                | 25.741                | 44.587                 |
|                     | -1.505                      | 47.930                | 12.906                | 23.610                 |
|                     | 9.104                       | 7.426                 | 11.878                | 28.141                 |
|                     | 4.454                       | 10.829                | 78.556                | 32.466                 |
|                     |                             | 36.416                | 11.870                | 52.734                 |
|                     |                             | 22.876                | 2.901                 | 41.600                 |
|                     | 77.244                      |                       | 51.215                |                        |
| Mean ± SEM          | 1.93 ± 3.48                 | 35.90 ± 6.77          | 22.53 ± 8.45          | 32.28 ± 4.26           |
