# Supplementary material for: The Novel, Nicotinic Alpha7 Receptor Partial Agonist, BMS-933043, Improves Cognition and Sensory Processing in Preclinical Models of Schizophrenia
Source: PubMed Central journal article supplement (PMC4965148; doi:10.1371/journal.pone.0159996), 2016-07-28
Supplement: pone.0159996.s006.pdf [file pone.0159996.s006.pdf]

**S6 Dataset. % Discrimination index (DI) results for individual subjects evaluated in mouse NOR after treatment with NS-6740 and BMS-933043.**

| Session             | % Discrimination Index (DI) |                        |                  |                        |
|---------------------|-----------------------------|------------------------|------------------|------------------------|
|                     | Vehicle/Vehicle             | Vehicle/<br>BMS-933043 | NS-6740/ Vehicle | NS-6740/<br>BMS-933043 |
| Training<br>(day 2) | 25.634                      | -4.818                 | -6.769           | -58.217                |
|                     | 5.242                       | 7.587                  | 15.975           | -20.202                |
|                     | 9.271                       | 24.102                 | -8.023           | -31.345                |
|                     | 13.317                      | -14.844                | 28.015           | 12.927                 |
|                     | -2.919                      | 16.037                 | 4.316            | -7.767                 |
|                     | -30.568                     | -57.547                | 54.554           | -28.279                |
|                     | 12.384                      | 10.150                 | 31.082           | 42.635                 |
|                     | 22.909                      | -38.671                | -14.523          | 7.104                  |
|                     | 5.467                       | -15.602                | 23.090           | -12.240                |
|                     | 58.300                      | -21.133                | 12.452           | -1.426                 |
|                     | 0.000                       | -4.286                 | -19.060          | 31.444                 |
|                     | 7.115                       | 0.310                  | -13.043          | -10.934                |
|                     | -71.62                      | 14.545                 | -20.904          | 5.412                  |
|                     | 7.490                       | -8.986                 | 0.722            | -31.737                |
|                     | 5.703                       | 5.131                  | 8.607            | 30.337                 |
|                     | -11.449                     |                        |                  |                        |
| Mean ± SEM          | 3.53 ± 6.82                 | -5.87 ± 5.59           | 6.43 ± 5.54      | -4.82 ± 7.09           |
| Testing<br>(day 3)  | 8.146                       | 26.274                 | 18.155           | 0.898                  |
|                     | 4.055                       | 56.605                 | -8.110           | -16.024                |
|                     | 13.622                      | 36.560                 | 0.319            | 21.509                 |
|                     | -19.231                     | 28.407                 | -10.083          | 19.058                 |
|                     | 26.183                      | 33.003                 | 10.541           | -0.179                 |
|                     | -4.303                      | 22.241                 | -2.851           | -24.362                |
|                     | 41.338                      | 25.363                 | -13.536          | 38.373                 |
|                     | 2.360                       | 1.070                  | 24.696           | 11.786                 |
|                     | 39.992                      | 38.444                 | -46.553          | 9.968                  |
|                     | -34.261                     | 9.918                  | 18.258           | 3.278                  |
|                     | -4.753                      | 49.569                 | -7.893           | 12.335                 |
|                     | 27.167                      | 21.604                 | 1.673            | -4.193                 |
|                     | -12.008                     | 31.363                 | 1.887            | -20.495                |
|                     | 38.071                      | 36.528                 | 5.935            | 5.243                  |
|                     | -0.874                      | 51.892                 | -7.708           | 0.282                  |
| -8.257              |                             |                        |                  |                        |
| Mean ± SEM          | 7.33 ± 5.55                 | 31.26 ± 3.86           | -1.02 ± 4.40     | 3.83 ± 4.25            |
