# Supplementary material for: The Novel, Nicotinic Alpha7 Receptor Partial Agonist, BMS-933043, Improves Cognition and Sensory Processing in Preclinical Models of Schizophrenia
Source: PubMed Central journal article supplement (PMC4965148; doi:10.1371/journal.pone.0159996), 2016-07-28
Supplement: pone.0159996.s007.pdf [file pone.0159996.s007.pdf]

**S7 Dataset. Number of trials to criteria for individual subjects evaluated in the MK-801 set shift model after treatment with BMS-933043.**

| Study                       | Vehicle/<br>Vehicle | Vehicle/<br>MK-801 | 0.3 mg/kg<br>BMS-933043<br>/MK-801 | 1 mg/kg<br>BMS-933043<br>/MK-801  | 3 mg/kg<br>BMS-933043<br>/MK-801  |
|-----------------------------|---------------------|--------------------|------------------------------------|-----------------------------------|-----------------------------------|
| BMS-933043<br>0.3 - 3 mg/kg | 38                  | 66                 | 80                                 | 57                                | 61                                |
|                             | 20                  | 80                 | 57                                 | 25                                | 42                                |
|                             | 50                  | 71                 | 78                                 | 65                                | 40                                |
|                             | 66                  | 75                 | 67                                 | 53                                | 64                                |
|                             | 49                  | 66                 | 45                                 | 60                                | 44                                |
|                             | 61                  | 61                 | 70                                 | 69                                | 55                                |
|                             | 50                  | 67                 | 66                                 | 42                                | 48                                |
|                             | 49                  | 60                 | 70                                 | 63                                | 26                                |
|                             | 32                  | 78                 | 62                                 | 73                                | 50                                |
|                             |                     | 80                 | 69                                 | 37                                | 73                                |
| Mean ± SEM                  | 46.1 ± 4.7          | 70.4 ± 2.4         | 66.4 ± 3.2                         | 54.4 ± 4.8                        | 50.3 ± 4.3                        |
| Study                       | Vehicle/<br>Vehicle | Vehicle/<br>MK-801 | 3 mg/kg<br>BMS-933043<br>/MK-801   | 10 mg/kg<br>BMS-933043<br>/MK-801 | 30 mg/kg<br>BMS-933043<br>/MK-801 |
| BMS-933043<br>3 - 30 mg/kg  | 63                  | 64                 | 59                                 | 50                                | 55                                |
|                             | 61                  | 52                 | 51                                 | 63                                | 44                                |
|                             | 76                  | 80                 | 80                                 | 72                                | 80                                |
|                             | 58                  | 72                 | 28                                 | 49                                | 62                                |
|                             | 63                  | 75                 | 67                                 | 50                                | 80                                |
|                             | 42                  | 75                 | 54                                 | 60                                | 80                                |
|                             | 46                  | 66                 | 20                                 | 51                                | 80                                |
|                             | 50                  | 80                 | 36                                 | 49                                | 55                                |
|                             | 32                  | 71                 | 37                                 | 61                                | 76                                |
|                             | 36                  | 71                 | 51                                 | 35                                |                                   |
| Mean ± SEM                  | 52.7 ± 4.4          | 70.6 ± 2.6         | 48.3 ± 5.8                         | 54.0 ± 3.2                        | 68.0 ± 4.7                        |
