# Supplementary material for: The Novel, Nicotinic Alpha7 Receptor Partial Agonist, BMS-933043, Improves Cognition and Sensory Processing in Preclinical Models of Schizophrenia
Source: PubMed Central journal article supplement (PMC4965148; doi:10.1371/journal.pone.0159996), 2016-07-28
Supplement: pone.0159996.s008.pdf [file pone.0159996.s008.pdf]

**S8 Dataset. % Time spent in the novel arm for individual mice evaluated in the MK-801 Y maze procedure after treatment with BMS-933043.**

|                  | Vehicle/<br>Vehicle | Vehicle/<br>MK-801 | 0.03<br>mg/kg<br>BMS-<br>933043/<br>MK-801 | 0.1<br>mg/kg<br>BMS-<br>933043/<br>MK-801 | 0.3<br>mg/kg<br>BMS-<br>933043/<br>MK-801 | 1<br>mg/kg<br>BMS-<br>933043/<br>MK-801 | 3<br>mg/kg<br>BMS-<br>933043/<br>MK-801 | 10<br>mg/kg<br>BMS-<br>933043/<br>MK-801 |
|------------------|---------------------|--------------------|--------------------------------------------|-------------------------------------------|-------------------------------------------|-----------------------------------------|-----------------------------------------|------------------------------------------|
|                  | 87                  | 85                 | 22                                         | 59                                        | 8                                         | 58                                      | 58                                      | 58                                       |
|                  | 79                  | 58                 | 79                                         | 79                                        | 69                                        | 82                                      | 77                                      | 65                                       |
|                  | 73                  | 67                 | 68                                         | 78                                        | 56                                        | 86                                      | 59                                      | 84                                       |
|                  | 71                  | 47                 | 90                                         | 29                                        | 49                                        | 84                                      | 86                                      | 63                                       |
|                  | 84                  | 50                 | 89                                         | 46                                        | 90                                        | 91                                      | 90                                      | 69                                       |
|                  | 55                  | 20                 | 28                                         | 76                                        | 65                                        | 88                                      | 91                                      | 69                                       |
|                  | 85                  | 54                 | 69                                         | 87                                        | 77                                        | 76                                      | 60                                      | 80                                       |
|                  | 71                  | 51                 | 74                                         | 85                                        | 59                                        | 75                                      | 78                                      | 89                                       |
|                  | 59                  | 23                 | 69                                         | 37                                        | 62                                        | 75                                      | 71                                      | 65                                       |
|                  | 77                  | 11                 | 65                                         | 73                                        | 66                                        | 54                                      | 73                                      | 63                                       |
|                  | 60                  | 84                 | 27                                         | 53                                        | 61                                        | 57                                      | 70                                      | 77                                       |
|                  | 76                  | 23                 | 80                                         | 55                                        | 64                                        | 67                                      | 84                                      | 91                                       |
|                  | 86                  | 51                 | 9                                          | 57                                        | 77                                        | 78                                      | 86                                      | 77                                       |
|                  | 72                  | 74                 | 14                                         | 53                                        | 56                                        | 87                                      | 93                                      | 71                                       |
|                  | 77                  | 40                 | 62                                         | 36                                        | 41                                        | 67                                      | 61                                      | 87                                       |
|                  | 86                  | 81                 | 81                                         | 49                                        | 83                                        | 86                                      | 71                                      | 58                                       |
|                  | 80                  |                    | 87                                         | 27                                        | 54                                        |                                         |                                         | 79                                       |
|                  | 77                  |                    |                                            | 67                                        |                                           |                                         |                                         | 67                                       |
| Mean<br>±<br>SEM | 75.3 ±<br>2.2       | 51.2 ±<br>5.9      | 59.6 ±<br>6.8                              | 58.1 ±<br>4.4                             | 61.0 ±<br>4.5                             | 75.7 ±<br>3.0                           | 75.5 ±<br>3.0                           | 72.8 ±<br>2.5                            |
