# Supplementary material for: The Novel, Nicotinic Alpha7 Receptor Partial Agonist, BMS-933043, Improves Cognition and Sensory Processing in Preclinical Models of Schizophrenia
Source: PubMed Central journal article supplement (PMC4965148; doi:10.1371/journal.pone.0159996), 2016-07-28
Supplement: pone.0159996.s009.pdf [file pone.0159996.s009.pdf]

**S9 Dataset. Gating ratio for individual subjects evaluated in the S(+)-ketamine N40 gating model after treatment with BMS-933043.**

| Treatment    | Vehicle      |               | BMS-933043 0.3 mg/kg  |               |
|--------------|--------------|---------------|-----------------------|---------------|
| Gating Ratio | Baseline     | Post-Ketamine | Baseline              | Post-Ketamine |
|              | 0.57         | 0.80          | 0.33                  | 0.65          |
|              | 0.42         | 0.78          | 0.47                  | 0.59          |
|              | 0.44         | 1.25          | 0.27                  | 0.45          |
|              | 0.76         | 1.50          | 0.70                  | 0.83          |
|              | 0.37         | 0.90          | 0.37                  | 0.65          |
|              | 0.58         | 1.00          | 0.44                  | 1.74          |
|              | 0.87         | 1.10          | 0.89                  | 0.83          |
|              | 0.25         | 0.57          | 0.55                  | 0.91          |
|              | 0.52         | 0.50          | 0.33                  | 0.75          |
|              | 0.37         | 0.65          | 0.37                  | 1.02          |
|              | 0.60         | 1.23          | 0.51                  | 0.40          |
|              | 0.54         | 1.44          | 0.49                  | 0.58          |
|              | 0.29         | 1.00          | 0.61                  | 0.43          |
| Mean ± SEM   | 0.51 ± 0.049 | 0.98 ± 0.088  | 0.49 ± 0.048          | 0.76 ± 0.097  |
| Treatment    | Vehicle      |               | BMS-933043 0.56 mg/kg |               |
| Gating Ratio | Baseline     | Post-Ketamine | Baseline              | Post-Ketamine |
|              | 0.31         | 1.06          | 0.48                  | 0.63          |
|              | 0.72         | 1.56          | 0.55                  | 1.18          |
|              | 0.56         | 1.62          | 0.35                  | 0.48          |
|              | 0.41         | 1.04          | 0.47                  | 0.82          |
|              | 0.49         | 1.27          | 0.50                  | 0.85          |
|              | 0.86         | 1.00          | 0.33                  | 0.95          |
|              | 0.84         | 1.82          | 0.52                  | 0.69          |
|              | 0.37         | 1.21          | 0.39                  | 0.68          |
|              | 0.38         | 2.68          | 0.43                  | 0.41          |
|              | 0.34         | 1.41          | 0.38                  | 0.92          |
|              | 0.44         | 2.07          | 0.53                  | 0.86          |
|              | 0.71         | 1.17          | 0.44                  | 1.08          |
|              | 0.49         | 0.96          | 0.62                  | 0.48          |
| Mean ± SEM   | 0.53 ± 0.053 | 1.5 ± 0.14    | 0.46 ± 0.023          | 0.77 ± 0.065  |
| Treatment    | Vehicle      |               | BMS-933043 1 mg/kg    |               |
| Gating Ratio | Baseline     | Post-Ketamine | Baseline              | Post-Ketamine |
|              | 0.62         | 1.13          | 0.38                  | 1.00          |
|              | 0.39         | 1.24          | 0.51                  | 0.35          |
|              | 0.49         | 1.50          | 0.19                  | 1.36          |
|              | 0.33         | 0.62          | 0.47                  | 1.00          |
|              | 0.51         | 1.24          | 0.27                  | 0.56          |
|              | 0.73         | 1.35          | 0.45                  | 0.50          |
|              | 0.44         | 1.90          | 0.55                  | 1.01          |
|              | 0.12         | 1.39          | 0.30                  | 0.64          |
|              | 0.25         | 2.72          | 0.48                  | 1.15          |
|              | 0.41         | 1.31          | 0.17                  | 0.45          |
|              | 0.87         | 1.31          | 0.38                  | 0.88          |
|              | 0.65         | 1.24          | 0.50                  | 1.65          |

|              |              |               |                     |               |
|--------------|--------------|---------------|---------------------|---------------|
|              | 0.56         | 2.12          | 0.64                | 0.53          |
| Mean ± SEM   | 0.49 ± 0.056 | 1.5 ± 0.14    | 0.41 ± 0.039        | 0.85 ± 0.11   |
| Treatment    | Vehicle      |               | BMS-933043 3 mg/kg  |               |
| Gating Ratio | Baseline     | Post-Ketamine | Baseline            | Post-Ketamine |
|              | 0.49         | 2.45          | 0.46                | 1.11          |
|              | 0.31         | 0.56          | 0.31                | 0.48          |
|              | 0.62         | 0.75          | 0.65                | 0.58          |
|              | 0.39         | 1.64          | 0.81                | 0.76          |
|              | 0.24         | 1.07          | 1.02                | 0.35          |
|              | 0.31         | 0.91          | 0.39                | 0.32          |
|              | 0.32         | 0.73          | 0.48                | 0.91          |
|              | 0.34         | 0.80          | 0.51                | 1.31          |
|              | 0.44         | 1.06          | 0.34                | 0.76          |
|              | 0.36         | 1.24          | 0.53                | 0.90          |
|              | 0.42         | 0.73          | 0.58                | 0.53          |
|              | 0.65         | 1.18          | 0.54                | 0.86          |
|              | 0.59         | 0.98          | 0.57                | 0.70          |
| Mean ± SEM   | 0.42 ± 0.036 | 1.1 ± 0.14    | 0.55 ± 0.053        | 0.74 ± 0.08   |
| Treatment    | Vehicle      |               | BMS-933043 10 mg/kg |               |
| Gating Ratio | Baseline     | Post-Ketamine | Baseline            | Post-Ketamine |
|              | 0.53         | 0.87          | 0.55                | 0.43          |
|              | 0.51         | 0.77          | 0.37                | 1.54          |
|              | 0.15         | 0.75          | 0.17                | 0.44          |
|              | 0.31         | 0.91          | 0.49                | 0.93          |
|              | 0.43         | 1.52          | 0.32                | 0.69          |
|              | 0.25         | 0.58          | 0.31                | 0.85          |
|              | 0.42         | 1.35          | 0.57                | 1.55          |
|              | 0.36         | 1.31          | 0.46                | 0.96          |
|              | 0.52         | 1.05          | 0.56                | 0.35          |
|              | 0.49         | 1.74          | 0.49                | 1.44          |
|              | 0.45         | 0.79          | 0.57                | 0.57          |
|              | 0.32         | 1.64          | 0.37                | 0.50          |
| Mean ± SEM   | 0.4 ± 0.034  | 1.1 ± 0.11    | 0.44 ± 0.037        | 0.85 ± 0.13   |
