# Supplementary material for: The Novel, Nicotinic Alpha7 Receptor Partial Agonist, BMS-933043, Improves Cognition and Sensory Processing in Preclinical Models of Schizophrenia
Source: PubMed Central journal article supplement (PMC4965148; doi:10.1371/journal.pone.0159996), 2016-07-28
Supplement: pone.0159996.s010.pdf [file pone.0159996.s010.pdf]

**S10 Dataset. Number of trials to criteria at each discrimination stage for individual rats evaluated in the neonatal PCP ID/ED model.**

| Discrimination                   | Sham/<br>Vehicle | PCP/<br>Vehicle | PCP/<br>0.1 mg/kg<br>BMS-<br>933043 | PCP/<br>0.3 mg/kg<br>BMS-<br>933043 | PCP/<br>1 mg/kg<br>BMS-<br>933043 | PCP/<br>3 mg/kg<br>BMS-<br>933043 |
|----------------------------------|------------------|-----------------|-------------------------------------|-------------------------------------|-----------------------------------|-----------------------------------|
| Simple                           | 7                | 16              | 7                                   | 10                                  | 6                                 | 7                                 |
|                                  | 15               | 8               | 11                                  | 15                                  | 12                                | 6                                 |
|                                  | 8                | 11              | 7                                   | 13                                  | 13                                | 7                                 |
|                                  | 14               | 7               | 9                                   | 8                                   | 6                                 | 7                                 |
|                                  | 7                | 7               | 8                                   | 9                                   | 12                                | 16                                |
|                                  | 9                | 7               | 10                                  | 12                                  | 11                                | 7                                 |
|                                  | 9                | 14              | 7                                   | 6                                   | 8                                 | 9                                 |
|                                  | 7                | 11              | 8                                   | 19                                  | 9                                 | 16                                |
|                                  | 8                | 8               | 6                                   | 7                                   | 6                                 | 6                                 |
|                                  | 7                | 14              | 16                                  | 8                                   |                                   |                                   |
| Complex                          | 11               | 8               | 6                                   | 18                                  | 6                                 | 6                                 |
|                                  | 11               | 6               | 16                                  | 10                                  | 11                                | 6                                 |
|                                  | 7                | 13              | 7                                   | 7                                   | 11                                | 8                                 |
|                                  | 14               | 10              | 8                                   | 6                                   | 7                                 | 16                                |
|                                  | 19               | 16              | 21                                  | 10                                  | 7                                 | 10                                |
|                                  | 13               | 8               | 19                                  | 8                                   | 13                                | 15                                |
|                                  | 13               | 8               | 8                                   | 6                                   | 6                                 | 17                                |
|                                  | 10               | 6               | 7                                   | 16                                  | 14                                | 11                                |
|                                  | 6                | 11              | 6                                   | 6                                   | 14                                | 10                                |
|                                  | 11               | 16              | 6                                   | 8                                   |                                   |                                   |
| Intra-<br>Dimensional<br>Shift 1 | 9                | 6               | 8                                   | 10                                  | 7                                 | 13                                |
|                                  | 15               | 11              | 6                                   | 6                                   | 8                                 | 11                                |
|                                  | 6                | 10              | 11                                  | 7                                   | 11                                | 18                                |
|                                  | 19               | 6               | 7                                   | 11                                  | 13                                | 7                                 |
|                                  | 15               | 10              | 10                                  | 8                                   | 6                                 | 13                                |
|                                  | 12               | 13              | 6                                   | 7                                   | 16                                | 10                                |
|                                  | 12               | 14              | 7                                   | 7                                   | 6                                 | 9                                 |
|                                  | 7                | 9               | 6                                   | 10                                  | 13                                | 11                                |
|                                  | 7                | 7               | 7                                   | 15                                  | 8                                 | 7                                 |
|                                  | 7                | 13              | 8                                   | 7                                   |                                   |                                   |
| Intra-<br>Dimensional<br>Shift 2 | 9                | 9               | 9                                   | 7                                   | 7                                 | 7                                 |
|                                  | 9                | 11              | 7                                   | 8                                   | 8                                 | 8                                 |
|                                  | 6                | 10              | 6                                   | 10                                  | 8                                 | 9                                 |
|                                  | 7                | 10              | 11                                  | 7                                   | 9                                 | 8                                 |
|                                  | 7                | 9               | 11                                  | 9                                   | 6                                 | 7                                 |
|                                  | 12               | 7               | 8                                   | 6                                   | 14                                | 13                                |
|                                  | 9                | 9               | 9                                   | 7                                   | 10                                | 8                                 |
|                                  | 6                | 12              | 7                                   | 10                                  | 9                                 | 7                                 |
|                                  | 6                | 6               | 8                                   | 12                                  | 8                                 | 11                                |
|                                  | 6                | 9               | 8                                   | 8                                   |                                   |                                   |

|                                    |    |    |    |    |    |    |
|------------------------------------|----|----|----|----|----|----|
| Intra-Dimensional Shift 2 Reversal | 9  | 9  | 7  | 6  | 10 | 7  |
|                                    | 9  | 8  | 8  | 6  | 11 | 8  |
|                                    | 10 | 12 | 10 | 8  | 8  | 8  |
|                                    | 6  | 7  | 6  | 7  | 9  | 9  |
|                                    | 11 | 7  | 11 | 13 | 7  | 11 |
|                                    | 10 | 8  | 9  | 8  | 9  | 6  |
|                                    | 7  | 6  | 8  | 10 | 6  | 10 |
|                                    | 6  | 7  | 9  | 11 | 10 | 10 |
|                                    | 11 | 8  | 6  | 9  | 7  | 10 |
|                                    | 11 | 13 | 10 | 10 |    |    |
| Extra-Dimensional Shift            | 6  | 22 | 15 | 10 | 13 | 14 |
|                                    | 13 | 29 | 8  | 16 | 17 | 9  |
|                                    | 12 | 14 | 12 | 9  | 17 | 10 |
|                                    | 10 | 19 | 9  | 19 | 10 | 15 |
|                                    | 7  | 23 | 11 | 10 | 8  | 12 |
|                                    | 10 | 29 | 18 | 6  | 7  | 8  |
|                                    | 9  | 24 | 14 | 11 | 10 | 9  |
|                                    | 13 | 28 | 19 | 7  | 7  | 8  |
|                                    | 7  | 12 | 8  | 8  | 11 | 6  |
|                                    | 6  | 28 | 17 | 6  |    |    |
