# Supplementary material for: The Novel, Nicotinic Alpha7 Receptor Partial Agonist, BMS-933043, Improves Cognition and Sensory Processing in Preclinical Models of Schizophrenia
Source: PubMed Central journal article supplement (PMC4965148; doi:10.1371/journal.pone.0159996), 2016-07-28
Supplement: pone.0159996.s011.pdf [file pone.0159996.s011.pdf]

**S11 Dataset. Individual AUC (150-200 ms) results for neonatal PCP treated rats evaluated in the MMN model after treatment with BMS-933043.**

| Study 1 | Vehicle     | 0.01 mg/kg BMS-933043 | 0.1 mg/kg BMS-933043 |
|---------|-------------|-----------------------|----------------------|
|         | -0.000040   | 0.000184              | -0.000065            |
|         | -0.000084   | -0.000213             | 0.000032             |
|         | -0.000259   | 0.000152              | 0.000006             |
|         | 0.000415    | -0.000150             | -0.000071            |
|         | -0.000090   | -0.000085             | -0.000085            |
|         | -0.000211   | 0.000079              | 0.000006             |
|         | -0.000092   | -0.000170             | -0.000297            |
|         | 0.000101    | -0.000173             | -0.000118            |
|         | -0.000215   | -0.000105             | -0.000262            |
|         | 0.000019    | -0.000192             | -0.000160            |
|         | -0.000156   | -0.000124             | -0.000175            |
|         | 0.000023    | -0.000002             | -0.000225            |
|         | -0.000245   | -0.000060             | -0.000130            |
| Mean    | -6.415e-005 | -6.608e-005           | -0.0001188           |
| SEM     | 5.046e-005  | 3.645e-005            | 2.873e-005           |
| Study 2 | Vehicle     | 0.03 mg/kg BMS-933043 | 0.1 mg/kg BMS-933043 |
|         | -0.000148   | -0.000686             | -0.000204            |
|         | 0.000000    | -0.000173             | -0.000978            |
|         | 0.000189    | -0.000246             | -0.000092            |
|         | 0.000032    | -0.000095             | -0.000137            |
|         | -0.000133   | -0.000251             | -0.000114            |
|         | -0.000195   | -0.000307             | 0.000051             |
|         | -0.000264   | -0.000162             | -0.000212            |
|         | -0.000195   | 0.000020              | -0.000220            |
|         | -0.000026   | -0.000202             | 0.000149             |
|         | -0.000219   | -0.000108             | -0.000062            |
|         | 0.000114    | -0.000463             | -0.000099            |
|         | -0.000097   | -0.000161             | -0.000140            |
| Mean    | -7.850e-005 | -0.0002362            | -0.0001715           |
| SEM     | 4.075e-005  | 5.347e-005            | 7.962e-005           |
| Study 3 | Vehicle     | 1 mg/kg BMS-933043    | 3 mg/kg BMS-933043   |
|         | -0.000093   | -0.000135             | -0.000308            |
|         | -0.000102   | -0.000245             | 0.000042             |
|         | -0.000002   | -0.000227             | -0.000215            |
|         | 0.000195    | -0.000008             | -0.000196            |
|         | 0.000095    | -0.000041             | -0.000025            |
|         | -0.000217   | -0.000308             | -0.000092            |
|         | -0.000270   | -0.000125             | 0.000040             |
|         | 0.000141    | 0.000174              | -0.000148            |
|         | 0.000057    | -0.000206             | -0.000204            |
|         | -0.000233   | -0.000100             | -0.000211            |
|         | -0.000063   | -0.000195             | 0.000128             |
|         | 0.000138    | -0.000135             | -0.000285            |
|         | -0.000168   | -0.000516             | -0.000269            |
| Mean    | -4.015e-005 | -0.000159             | -0.0001341           |
| SEM     | 4.340e-005  | 4.519e-005            | 3.892e-005           |
