# Supplementary material for: The Novel, Nicotinic Alpha7 Receptor Partial Agonist, BMS-933043, Improves Cognition and Sensory Processing in Preclinical Models of Schizophrenia
Source: PubMed Central journal article supplement (PMC4965148; doi:10.1371/journal.pone.0159996), 2016-07-28
Supplement: pone.0159996.s012.pdf [file pone.0159996.s012.pdf]

**S12 Dataset. Ex vivo  $\alpha 7$  nAChR receptor occupancy results for individual subjects.**

| <b>Mouse Dose Response</b> | <b>Individual % occupancy result</b>  |
|----------------------------|---------------------------------------|
| 0.3 mg/kg sc BMS-933043    | 11.2, -5.2, 7.5, -6.3                 |
| 1 mg/kg sc BMS-933043      | 23.9, 18.3, 25.5, 25.4                |
| 3 mg/kg sc BMS-933043      | 45.1, 41.3, 56.2, 44.9                |
| 10 mg/kg sc BMS-933043     | 78.5, 76.4, 74.8, 75.4                |
| 100 mg/kg sc BMS-933043    | 91.3, 93.3, 94.1, 92.1                |
| <b>Rat Dose Response</b>   | <b>Individual % occupancy results</b> |
| 1 mg/kg po BMS-933043      | 27, 22, 6, 42                         |
| 3 mg/kg po BMS-933043      | 65, 63, 62, 28                        |
| 10 mg/kg po BMS-933043     | 80, 83, 78, 77                        |
| 30 mg/kg po BMS-933043     | 82, 90, 67, 69                        |
