# Supplementary material for: The Novel, Nicotinic Alpha7 Receptor Partial Agonist, BMS-933043, Improves Cognition and Sensory Processing in Preclinical Models of Schizophrenia
Source: PubMed Central journal article supplement (PMC4965148; doi:10.1371/journal.pone.0159996), 2016-07-28

**S2 Fig. Inhibition of [<sup>3</sup>H]A-585539 binding to α7 nACh receptors.** Representative competition binding curves for BMS-933043, EVP-6124, A-582941 and (-)-nicotine at A) native rat brain α7 nAChR and B) recombinant human α7 nAChR. All data points are the mean ± S.E.M. determined from duplicate samples at each concentration.

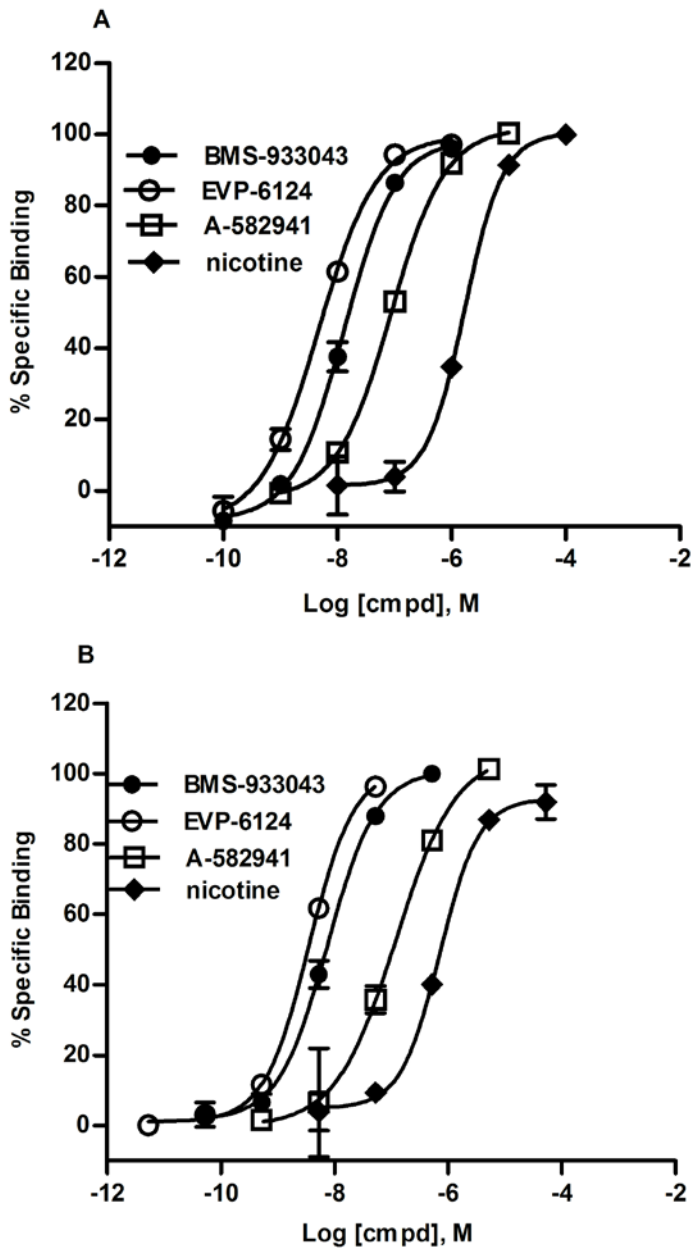

Supplement: pone.0159996.s014.pdf [file pone.0159996.s014.pdf]
