# Supplementary material for: The Novel, Nicotinic Alpha7 Receptor Partial Agonist, BMS-933043, Improves Cognition and Sensory Processing in Preclinical Models of Schizophrenia
Source: PubMed Central journal article supplement (PMC4965148; doi:10.1371/journal.pone.0159996), 2016-07-28

**S3 Fig. Inhibition of [<sup>3</sup>H]-granisetron binding to human 5-HT<sub>3A</sub> receptors.**

Representative competition binding curves for BMS-933043, granisetron, MDL-72222 and EVP-6124. Each point shows the mean  $\pm$  S.E.M. determined from duplicate samples at each concentration.

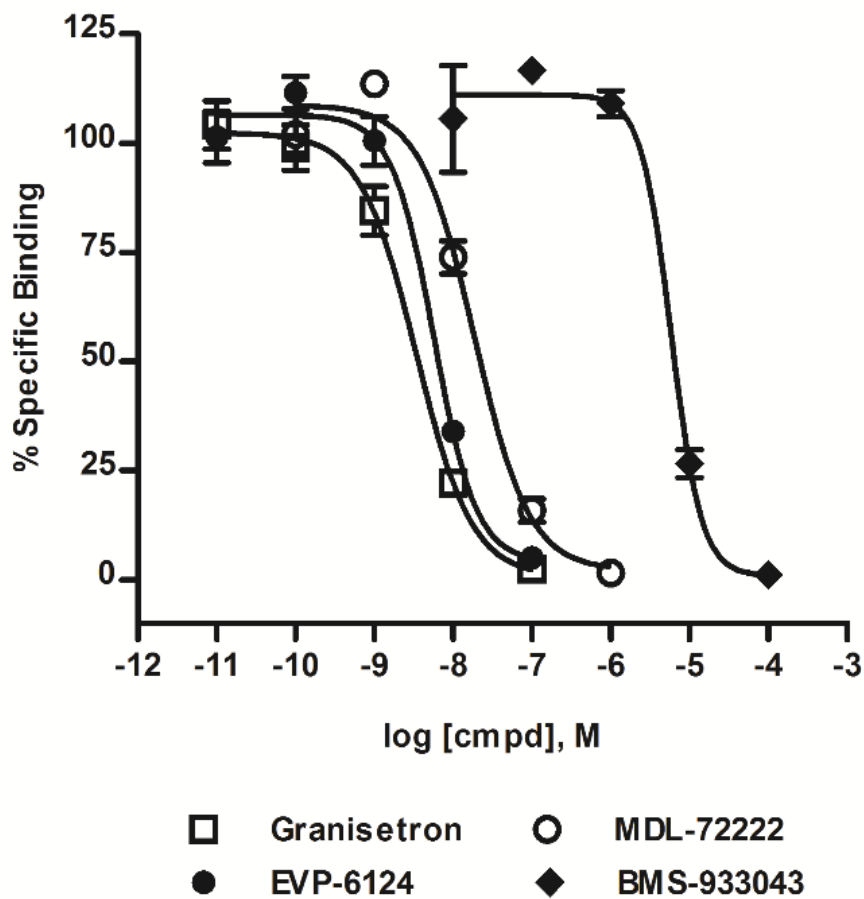

Supplement: pone.0159996.s015.pdf [file pone.0159996.s015.pdf]
