# Supplementary material for: The Novel, Nicotinic Alpha7 Receptor Partial Agonist, BMS-933043, Improves Cognition and Sensory Processing in Preclinical Models of Schizophrenia
Source: PubMed Central journal article supplement (PMC4965148; doi:10.1371/journal.pone.0159996), 2016-07-28

**S4 Fig. Agonist profile of EVP-6124 and TC-5619 in voltage clamp electrophysiology.** Results show the mean  $\pm$  S.E.M. peak current (open circles) or net charge crossing the membrane (closed circles) normalized to the maximal response induced by ACh determined in HEK293/rat  $\alpha 7$  nAChR cells (TC-5619; n=3) or HEK293/human  $\alpha 7$  nAChR cells (EVP-6124; n=4).

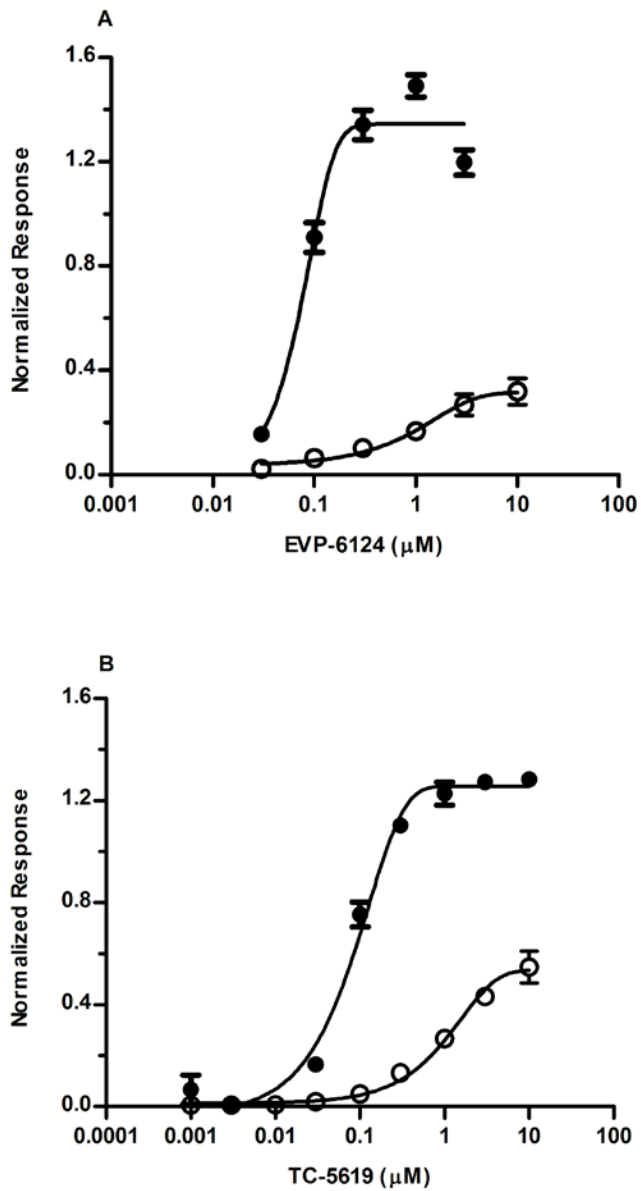

Supplement: pone.0159996.s016.pdf [file pone.0159996.s016.pdf]
