# Supplementary material for: The Novel, Nicotinic Alpha7 Receptor Partial Agonist, BMS-933043, Improves Cognition and Sensory Processing in Preclinical Models of Schizophrenia
Source: PubMed Central journal article supplement (PMC4965148; doi:10.1371/journal.pone.0159996), 2016-07-28
Supplement: pone.0159996.s019.pdf [file pone.0159996.s019.pdf]

**S7 Fig. BMS-933043 reduces perseverative errors in MK-801-treated rats performing the maze based set shifting task.** Results show the mean  $\pm$  S.E.M. number of perseverative errors and were analyzed by ANOVA followed by Dunnett's post hoc analysis comparing all groups to vehicle/MK-801-treated rats; \*  $p < 0.05$ , \*\*  $p < 0.01$ , \*\*\*  $p < 0.001$  (n=9-10/group).

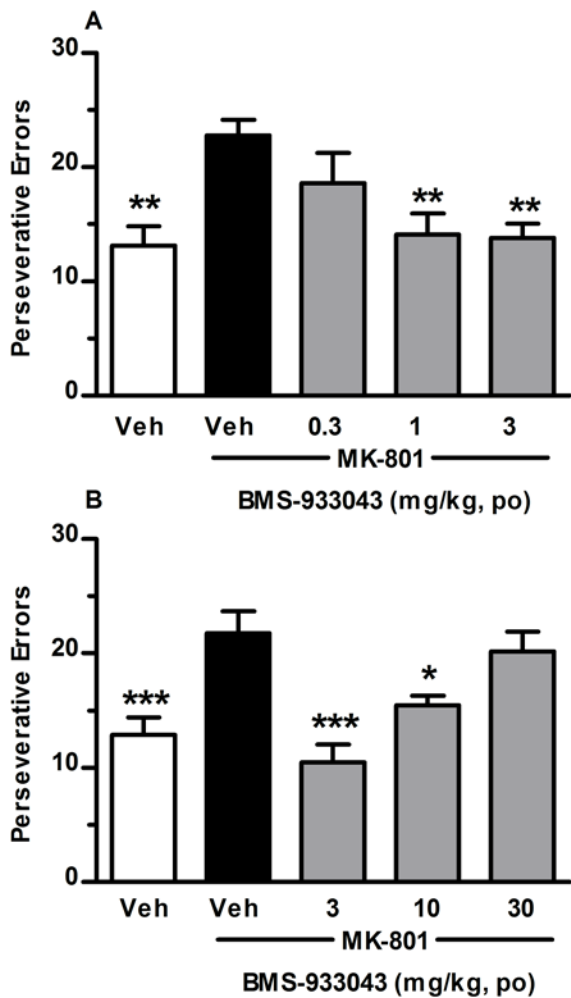

ANOVA results: A)  $F(4,44)=5.09$ ,  $p=0.002$ ; B)  $F(4,44)=9.475$ ,  $p<0.0001$
