# Supplementary material for: The Novel, Nicotinic Alpha7 Receptor Partial Agonist, BMS-933043, Improves Cognition and Sensory Processing in Preclinical Models of Schizophrenia
Source: PubMed Central journal article supplement (PMC4965148; doi:10.1371/journal.pone.0159996), 2016-07-28
Supplement: pone.0159996.s020.pdf [file pone.0159996.s020.pdf]

**S8 Fig. EDS impairment and improvement following BMS-933043 treatment is similar in neonatal PCP treated rats shifted from media to odor or odor to media at the EDS stage.** Results show the mean  $\pm$  SEM trials to achieve performance criteria at each discrimination stage (n= 9-10/group) and were analyzed by 2 way repeated measures ANOVA followed by Dunnett's post hoc test; \*\*\* p=0.0004, \*\*\*\* p=0.0001 versus PCP/veh.

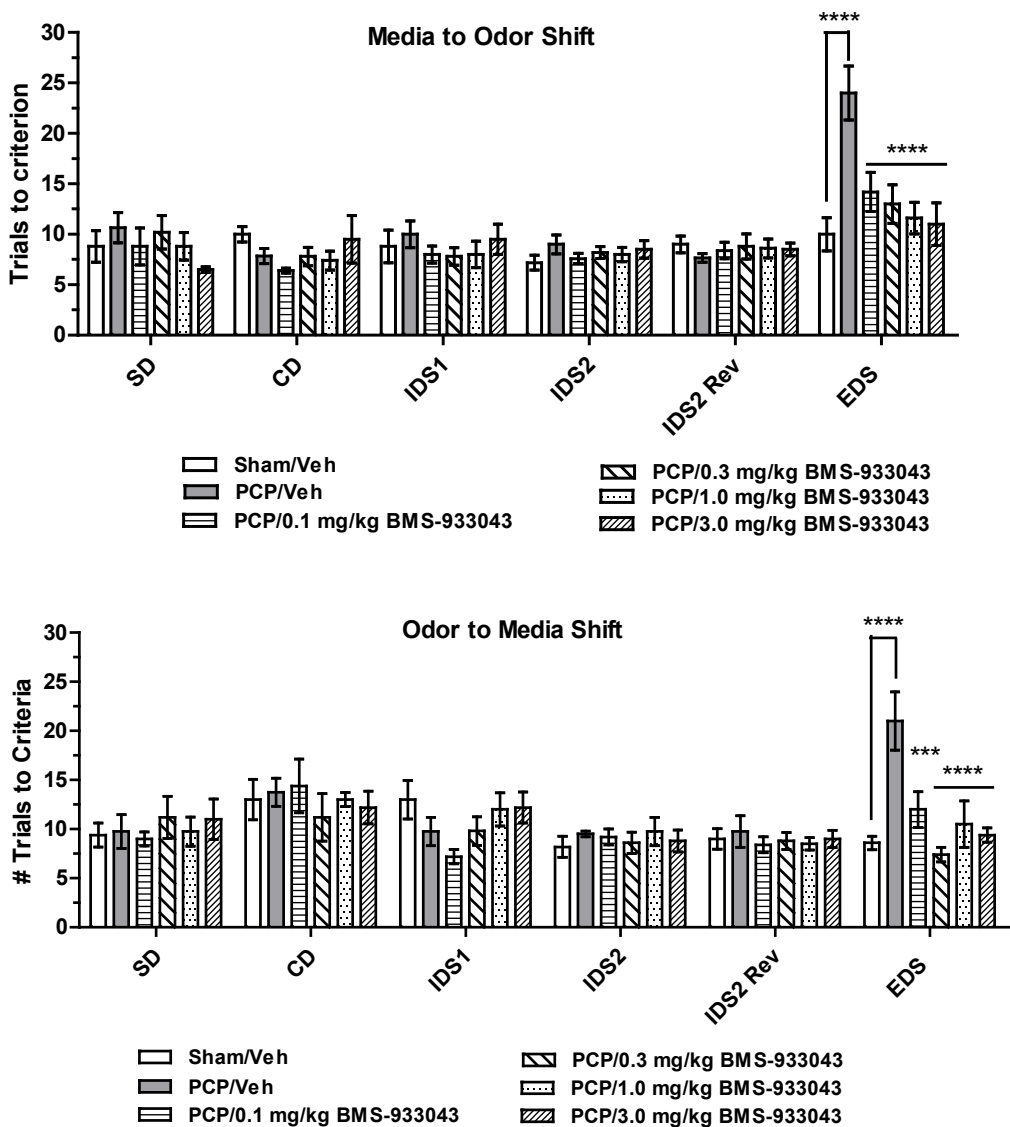

ANOVA results: Media to odor: Treatment effect  $F(5,24)=3.43$ ,  $p=0.018$ ; Discrimination effect  $F(5,120)=18.17$ ,  $p<0.0001$ ; treatment x discrimination interaction  $F(25,120)=3.27$ ,  $p<0.0001$ .  
Odor to media: treatment effect  $F(5,22)=1.42$ ,  $p=0.257$ ; Discrimination effect  $F(5,110)=6.637$ ,  $p<0.0001$ ; treatment x discrimination interaction  $F(25,110)=2.325$ ,  $p=0.0015$ .
