# Supplementary material for: The Novel, Nicotinic Alpha7 Receptor Partial Agonist, BMS-933043, Improves Cognition and Sensory Processing in Preclinical Models of Schizophrenia
Source: PubMed Central journal article supplement (PMC4965148; doi:10.1371/journal.pone.0159996), 2016-07-28
Supplement: pone.0159996.s021.pdf [file pone.0159996.s021.pdf]

**S9 Fig. BMS-933043 decreases the time to complete the EDS discrimination in neonatal PCP-treated rats.** Results show the mean  $\pm$  S.E.M. time to complete each discrimination and were analyzed by 2 way repeated measures ANOVA followed by Dunnett's post-hoc analysis comparing all groups to neonatal PCP/vehicle treated rats; \* $p=0.0147$ , \*\*\*  $p=0.0005$ , \*\*\*\* $p = 0.0001$  (n= 9-10/group).

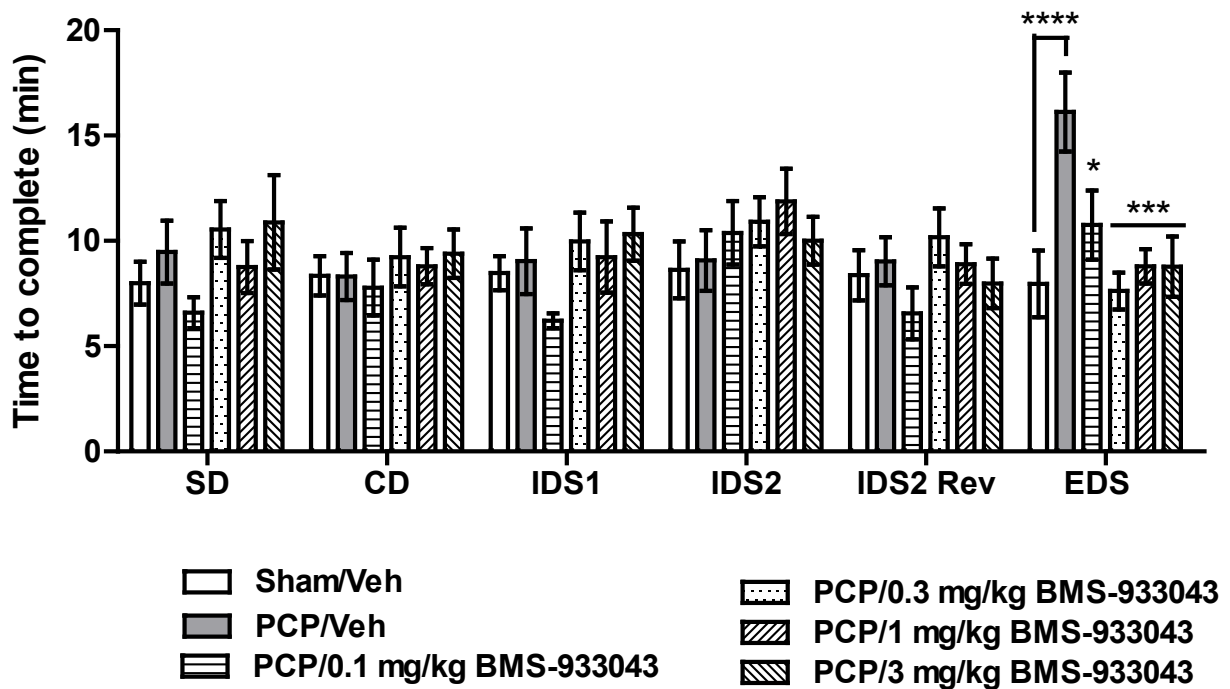

ANOVA results: Treatment effect  $F(5,52)=1.041$ ,  $p=0.4036$ ; Discrimination effect  $F(5,260)=2.469$ ,  $p=0.033$ ; treatment x discrimination interaction  $F(25,260)=2.356$ ,  $p=0.0004$ .
