# Supplementary material for: The Novel, Nicotinic Alpha7 Receptor Partial Agonist, BMS-933043, Improves Cognition and Sensory Processing in Preclinical Models of Schizophrenia
Source: PubMed Central journal article supplement (PMC4965148; doi:10.1371/journal.pone.0159996), 2016-07-28
Supplement: pone.0159996.s022.pdf [file pone.0159996.s022.pdf]

**S1 Table. Example of exemplars used at each discrimination phase of the rat ID/ED task.**

| Discrimination Stage | Correct Dimension | Correct Exemplar | Exemplars Presented               |                         |
|----------------------|-------------------|------------------|-----------------------------------|-------------------------|
|                      |                   |                  | Medium                            | Odor                    |
| SD                   | Medium            | Foam rubber      | Foam rubber<br>Plastic beads      | None                    |
| CD                   | Medium            | Foam rubber      | Foam rubber<br>Plastic beads      | Vanilla<br>Jasmine      |
| IDS1                 | Medium            | Yarn             | Yarn<br>Pom Poms                  | Orange<br>Sage          |
| IDS2                 | Medium            | Glass beads      | Glass beads<br>Aquarium gravel    | Patchouli<br>Strawberry |
| IDSrev               | Medium            | Aquarium gravel  | Glass beads<br>Aquarium gravel    | Patchouli<br>Strawberry |
| EDS                  | Odor              | Cinnamon         | Aspen shavings<br>Shredded Folder | Cinnamon<br>Gardenia    |

SD: simple discrimination; CD: compound discrimination; IDS1: intra-dimensional shift 1; IDS2: intra-dimensional shift 2; IDS2rev: intra-dimensional shift 2 reversal; EDS: extra-dimensional shift.
