# Supplementary material for: The Novel, Nicotinic Alpha7 Receptor Partial Agonist, BMS-933043, Improves Cognition and Sensory Processing in Preclinical Models of Schizophrenia
Source: PubMed Central journal article supplement (PMC4965148; doi:10.1371/journal.pone.0159996), 2016-07-28
Supplement: pone.0159996.s023.pdf [file pone.0159996.s023.pdf]

**S2 Table. Pharmacological evaluation of BMS-933043 at other receptor and enzyme targets.**

| Target                     | Species | Assay type | Result                      |
|----------------------------|---------|------------|-----------------------------|
| Acetylcholinesterase       | Eel     | Enzyme     | IC <sub>50</sub> >60 µM     |
| Adenosine A2a              | Human   | Binding    | IC <sub>50</sub> >30 µM     |
| Adrenergic α1B             | Human   | Binding    | IC <sub>50</sub> >30 µM     |
| Adrenergic α1D             | Human   | Binding    | IC <sub>50</sub> >30 µM     |
| Adrenergic α2A             | Human   | Binding    | IC <sub>50</sub> >30 µM     |
| Adrenergic α2C             | Human   | Binding    | IC <sub>50</sub> >30 µM     |
| Androgen receptor          | Rat     | Binding    | IC <sub>50</sub> >150 µM    |
| Nav1.5                     | Human   | Functional | IC <sub>50</sub> >30 µM     |
| CB1                        | Human   | Binding    | -5% inhibition @ 10 µM      |
| Dopamine D1                | Human   | Binding    | IC <sub>50</sub> >30 µM     |
| Dopamine D2                | Human   | Binding    | IC <sub>50</sub> >30 µM     |
| Dopamine transporter       | Human   | Binding    | IC <sub>50</sub> >30 µM     |
| Estrogen receptor alpha    | Human   | Binding    | IC <sub>50</sub> >150 µM    |
| GABA-A α1β2γ 2             | Human   | Functional | IC <sub>50</sub> >30 µM     |
| Glucocorticoid receptor    | Human   | Binding    | IC <sub>50</sub> >150 µM    |
| Histamine H1               | Human   | Binding    | IC <sub>50</sub> >30 µM     |
| Histamine H2               | Human   | Binding    | IC <sub>50</sub> >30 µM     |
| L-type calcium channel     | Human   | Functional | IC <sub>50</sub> >25 µM     |
| MAO-A                      | Human   | Enzyme     | IC <sub>50</sub> >30 µM     |
| MAO-B                      | Human   | Enzyme     | IC <sub>50</sub> >30 µM     |
| Muscarinic M <sub>1</sub>  | Human   | Binding    | 11% inhibition @ 10 µM      |
| Muscarinic M <sub>2</sub>  | Human   | Binding    | IC <sub>50</sub> = 19.14 µM |
| Muscarinic M <sub>3</sub>  | Human   | Binding    | 18% inhibition @ 10 µM      |
| Muscarinic M <sub>4</sub>  | Human   | Binding    | 10% inhibition @ 10 µM      |
| Muscarinic M <sub>5</sub>  | Human   | Binding    | 8% inhibition @ 10 µM       |
| NMDA NR1/2A                | Human   | Functional | IC <sub>50</sub> >30 µM     |
| Norepinephrine transporter | Human   | Binding    | IC <sub>50</sub> >30 µM     |
| Opiate Mu                  | Human   | Binding    | IC <sub>50</sub> >30 µM     |
| Opiate Kappa               | Human   | Binding    | IC <sub>50</sub> >30 µM     |
| PDE3                       | Human   | Enzyme     | IC <sub>50</sub> >30 µM     |
| PDE4                       | Human   | Enzyme     | IC <sub>50</sub> >30 µM     |
| Progesterone receptor      | Human   | Binding    | IC <sub>50</sub> >150 µM    |
| 5-HT <sub>1A</sub>         | Human   | Binding    | 9% inhibition @ 10 µM       |
| 5-HT <sub>1B</sub>         | Rat     | Binding    | 0% inhibition @ 10 µM       |
| 5-HT <sub>2A</sub>         | Human   | Functional | EC <sub>50</sub> >10 µM     |
| 5-HT <sub>2B</sub>         | Human   | Functional | EC <sub>50</sub> >10 µM     |
| 5-HT transporter           | Human   | Binding    | IC <sub>50</sub> >30 µM     |
