# Supplementary material for: The Novel, Nicotinic Alpha7 Receptor Partial Agonist, BMS-933043, Improves Cognition and Sensory Processing in Preclinical Models of Schizophrenia
Source: PubMed Central journal article supplement (PMC4965148; doi:10.1371/journal.pone.0159996), 2016-07-28
Supplement: pone.0159996.s024.pdf [file pone.0159996.s024.pdf]

**S3 Table. Plasma and brain concentrations of BMS-933043 determined after subcutaneous or oral dosing in rodents.**

| Model                  | BMS-933043 Dose & Route | Time    | Plasma (nM) Mean $\pm$ SD | Brain (nM) Mean $\pm$ SD | Brain/Plasma (%) |
|------------------------|-------------------------|---------|---------------------------|--------------------------|------------------|
| Mouse NOR              | 0.03 mg/kg sc           | 30 min  | 14 $\pm$ 2.7              | <LLQ                     | ND               |
|                        | 0.10 mg/kg sc           | 30 min  | 52 $\pm$ 3.6              | <LLQ                     | ND               |
|                        | 0.30 mg/kg sc           | 30 min  | 213 $\pm$ 49              | 24 $\pm$ 3.9             | 12%              |
|                        | 1 mg/kg sc              | 30 min  | 719 $\pm$ 69              | 78 $\pm$ 5.2             | 11%              |
| Mouse NOR              | 1 mg/kg sc              | 30 min  | 459 $\pm$ 59              | 97 $\pm$ 16              | 21%              |
|                        | 3 mg/kg sc              | 30 min  | 1,568 $\pm$ 103           | 297 $\pm$ 48             | 19%              |
|                        | 10 mg/kg sc             | 30 min  | 5,555 $\pm$ 789           | 1,113 $\pm$ 162          | 20%              |
| Rat MK-801 Set Shift   | 0.30 mg/kg po           | 150 min | 5.7 $\pm$ 0.9             | <LLQ                     | ND               |
|                        | 1 mg/kg po              | 150 min | 50 $\pm$ 7.4              | 13 $\pm$ 3               | 25%              |
|                        | 3 mg/kg po              | 150 min | 410 $\pm$ 97              | 100 $\pm$ 39             | 24%              |
| Rat MK-801 Set Shift   | 3 mg/kg po              | 150 min | 452 $\pm$ 60              | 132 $\pm$ 17             | 29%              |
|                        | 10 mg/kg po             | 150 min | 1,860 $\pm$ 507           | 533 $\pm$ 111            | 29%              |
|                        | 30 mg/kg po             | 150 min | 7,255 $\pm$ 573           | 2,216 $\pm$ 36           | 31%              |
| Mouse MK-801 Y Maze    | 0.03 mg/kg sc           | 60 min  | 5 $\pm$ 0.4               | ND                       | ND               |
|                        | 0.10 mg/kg sc           | 60 min  | 21 $\pm$ 2.4              | ND                       | ND               |
|                        | 0.30 mg/kg sc           | 60 min  | 94 $\pm$ 19               | ND                       | ND               |
|                        | 1 mg/kg sc              | 60 min  | 254 $\pm$ 32              | ND                       | ND               |
|                        | 3 mg/kg sc              | 60 min  | 774 $\pm$ 282             | ND                       | ND               |
|                        | 10 mg/kg sc             | 60 min  | 2,982 $\pm$ 390           | ND                       | ND               |
| Rat N40 Gating         | 0.30 mg/kg sc           | 30 min  | 81 $\pm$ 8                | 21 $\pm$ 6               | 26%              |
|                        | 0.56 mg/kg sc           | 30 min  | 146 $\pm$ 12              | 42 $\pm$ 10              | 30%              |
|                        | 1 mg/kg sc              | 30 min  | 295 $\pm$ 27              | 97 $\pm$ 14              | 33%              |
|                        | 3 mg/kg sc              | 30 min  | 1,360 $\pm$ 175           | 372 $\pm$ 33             | 27%              |
| Rat Neonatal PCP ID/ED | 0.10 mg/kg po           | 150 min | <LLQ                      | ND                       | ND               |
|                        | 0.30 mg/kg po           | 150 min | <LLQ                      | ND                       | ND               |
|                        | 1 mg/kg po              | 150 min | 21 $\pm$ 9                | ND                       | ND               |
|                        | 3 mg/kg po              | 150 min | 225 $\pm$ 50              | ND                       | ND               |
| Rat MMN                | 0.01 mg/kg sc           | 30 min  | 2.4 $\pm$ 0.1             | ND                       | ND               |
|                        | 0.03 mg/kg sc           | 30 min  | 23 $\pm$ 29               | 13                       | 57%              |
|                        | 0.10 mg/kg sc           | 30 min  | 24 $\pm$ 0.6              | ND                       | ND               |
|                        | 0.30 mg/kg sc           | 30 min  | 75 $\pm$ 6                | 13 $\pm$ 0.65            | 17%              |
|                        | 1 mg/kg sc              | 30 min  | 398 $\pm$ 139             | 74 $\pm$ 18              | 19%              |
|                        | 3 mg/kg sc              | 30 min  | 1,974 $\pm$ 272           | 378 $\pm$ 161            | 19%              |

LLQ: lower limit of quantification; ND: not determined.
