# Supplementary material for: The Novel, Nicotinic Alpha7 Receptor Partial Agonist, BMS-933043, Improves Cognition and Sensory Processing in Preclinical Models of Schizophrenia
Source: PubMed Central journal article supplement (PMC4965148; doi:10.1371/journal.pone.0159996), 2016-07-28
Supplement: pone.0159996.s025.pdf [file pone.0159996.s025.pdf]

**S4 Table. Plasma and brain concentrations of NS-6740 determined after subcutaneous dosing in mice.**

| Dose      | Plasma (nM)<br>Mean $\pm$ SD | Brain (nM)<br>Mean $\pm$ SD | Brain/Plasma<br>Ratio |
|-----------|------------------------------|-----------------------------|-----------------------|
| 0.3 mg/kg | 37 $\pm$ 2                   | 316 $\pm$ 43                | 8.54                  |
| 1 mg/kg   | 130 $\pm$ 7                  | 1,125 $\pm$ 66              | 8.65                  |
| 3 mg/kg   | 544 $\pm$ 214                | 3,998 $\pm$ 273             | 7.35                  |
| 10 mg/kg  | 2,083 $\pm$ 426              | 17,725 $\pm$ 1,928          | 8.51                  |
